# Supplementary material for: Fe/Fe3C modification to effectively achieve high-performance Si–C anode materials
Source: Royal Society of Chemistry journal article supplement (doi:10.1039/d2ta06008f), 2022-01-01
Supplement: d2ta06008f1.pdf [file d2ta06008f1.pdf]

## Supporting Information

### Fe/Fe<sub>3</sub>C modification to effectively achieve high-performance Si-C anode

Xuqi Lin<sup>1,2,3</sup>, Jingguo Gao<sup>1,2,3</sup>, Kehua Zhong<sup>1,2,3</sup>, Yongcong Huang<sup>1,2,3</sup>, Hurong Yao<sup>1,2,3</sup>, Yingbin Lin<sup>1,2,3</sup>,

Yongping Zheng<sup>1,2,3\*</sup>, Zhigao Huang<sup>1,2,3\*</sup>, Jiaxin Li<sup>1,2,3\*</sup>

<sup>1</sup> College of Physics and Energy, Fujian Provincial Solar Energy Conversion and Energy Storage Engineering  
Technology Research Center, Fujian Normal University, Fuzhou, 350117, China.

<sup>2</sup> Fujian Provincial Key Laboratory of Quantum Manipulation and New Energy Materials, Fuzhou, 350117, China.

<sup>3</sup> Fujian Provincial Collaborative Innovation Center for Advanced High-Field Superconducting Materials and  
Engineering, Fuzhou, 350117, China.

\*Corresponding author: Dr.&Prof. Jiaxin Li; Dr. Yongping Zheng; Dr.&Prof. Zhigao Huang

Tel: +86-591-2286-8132; Fax: +86-591-2286-8132

\*E-mail: [lijiaxin@fjnu.edu.cn](mailto:lijiaxin@fjnu.edu.cn); [zyp@fjnu.edu.cn](mailto:zyp@fjnu.edu.cn); [zg Huang@fjnu.edu.cn](mailto:zg Huang@fjnu.edu.cn).

## TGA Calculation:

It is known from the [Figure 3b](#) that as the temperature increases, both show that the percentage of material decreases and then rises after a plateau, which represent the Si content of Si@CNFs and the Si and Fe<sub>2</sub>O<sub>3</sub> content of Fe/Fe<sub>3</sub>C-Si@CNFs, respectively. Meanwhile, the contents of Si@CNFs and Fe/Fe<sub>3</sub>C-Si@CNFs at plateau are 42.4% and 52.7%, respectively. The falling phenomenon can be attributed to the disappearance of the carbon material, and the subsequent rising phenomenon belongs to the process of silicon oxidation. In addition, Fe/Fe<sub>3</sub>C-Si@CNFs also includes the oxidation reaction of Fe in the process of material percentage decrease. Based on the above, we can calculate as follows: The proportion of SiOx in Si@CNFs accounts for 63.7% after oxidation. The equation can be listed as

$$: \frac{42.4}{28} = \frac{63.7}{28 + 16x}$$

The proportion of SiOx and Fe<sub>2</sub>O<sub>3</sub> in Fe/Fe<sub>3</sub>C-Si@CNFs accounts for 72.2% after oxidation. The

equation can be listed as: 
$$\frac{y}{28} = \frac{z}{28 + 16x}$$

$$b + y = 52.7$$

$$b + z = 72.2$$

$$\frac{a}{56} = \frac{b}{56 * 2 + 16 * 3}$$

x- the number of atoms occupied by O in SiOx;

y- the proportion of Si in Fe/Fe<sub>3</sub>C-Si@CNFs;

z- the proportion of SiOx in Fe/Fe<sub>3</sub>C-Si@CNFs;

a- the proportion of Fe in Fe/Fe<sub>3</sub>C-Si@CNFs;

b- the proportion of Fe<sub>2</sub>O<sub>3</sub> in Fe/Fe<sub>3</sub>C-Si@CNFs;

The proportion of Fe and Si in Fe/Fe<sub>3</sub>C-Si@CNFs accounts for 39% and 4.8%, respectively.

The proportion of Si in Si@CNFs accounts for 42%.

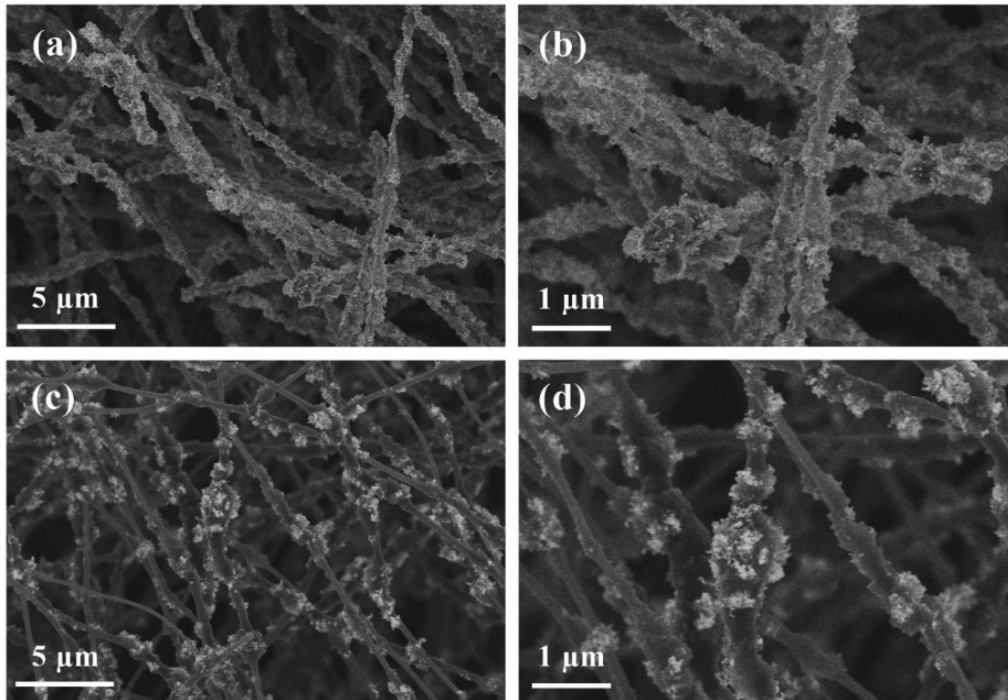

**Figure S1.** The different magnified SEM images of (a, b) Fe/Fe<sub>3</sub>C-Si@CNFs and (c, d) Si@CNFs composite.

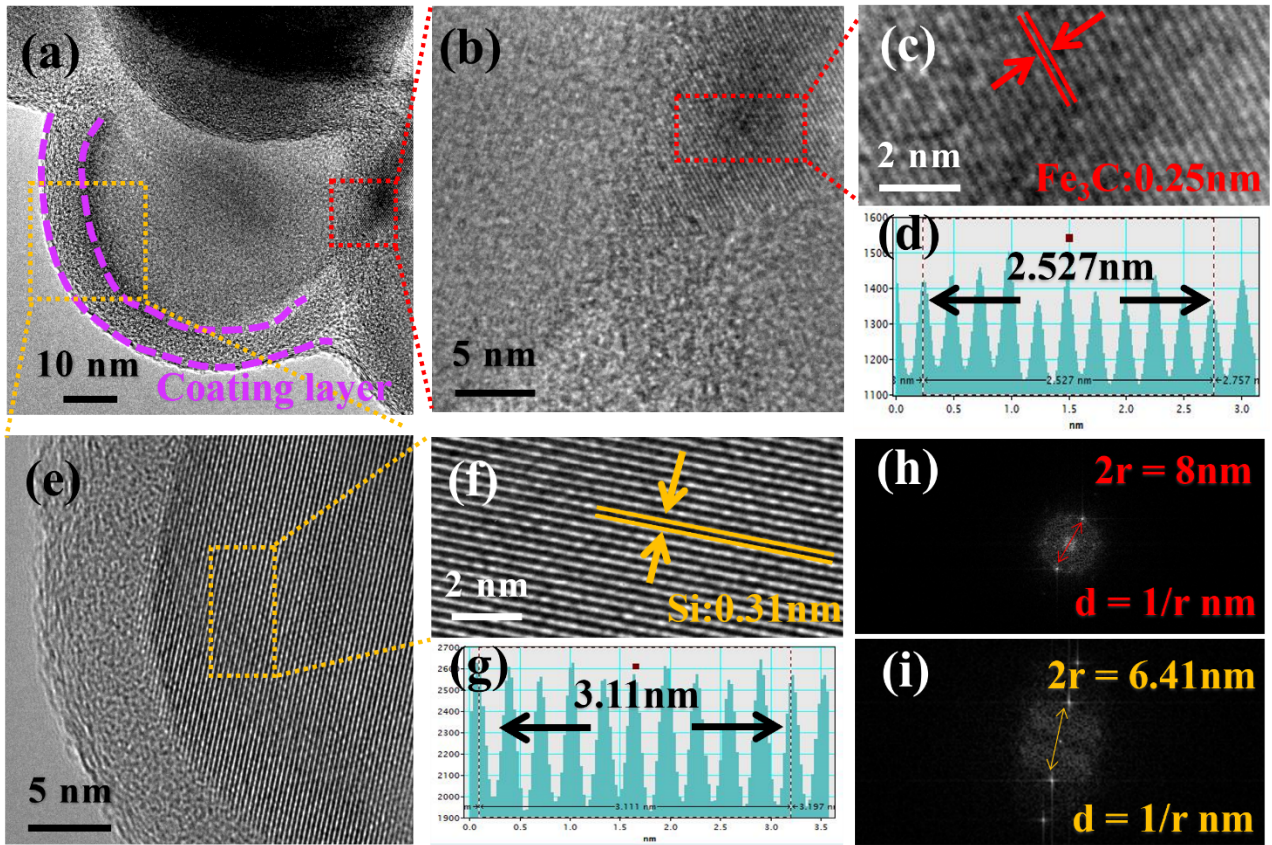

**Figure S2.** The HR-TEM images of the Fe/Fe<sub>3</sub>C-Si@CNFs composite: (a, b, e) HR-TEM images; The specific position of lattice fringes, line profiles, and FFT for Fe<sub>3</sub>C (c, d, h) and Si (f, g, i).

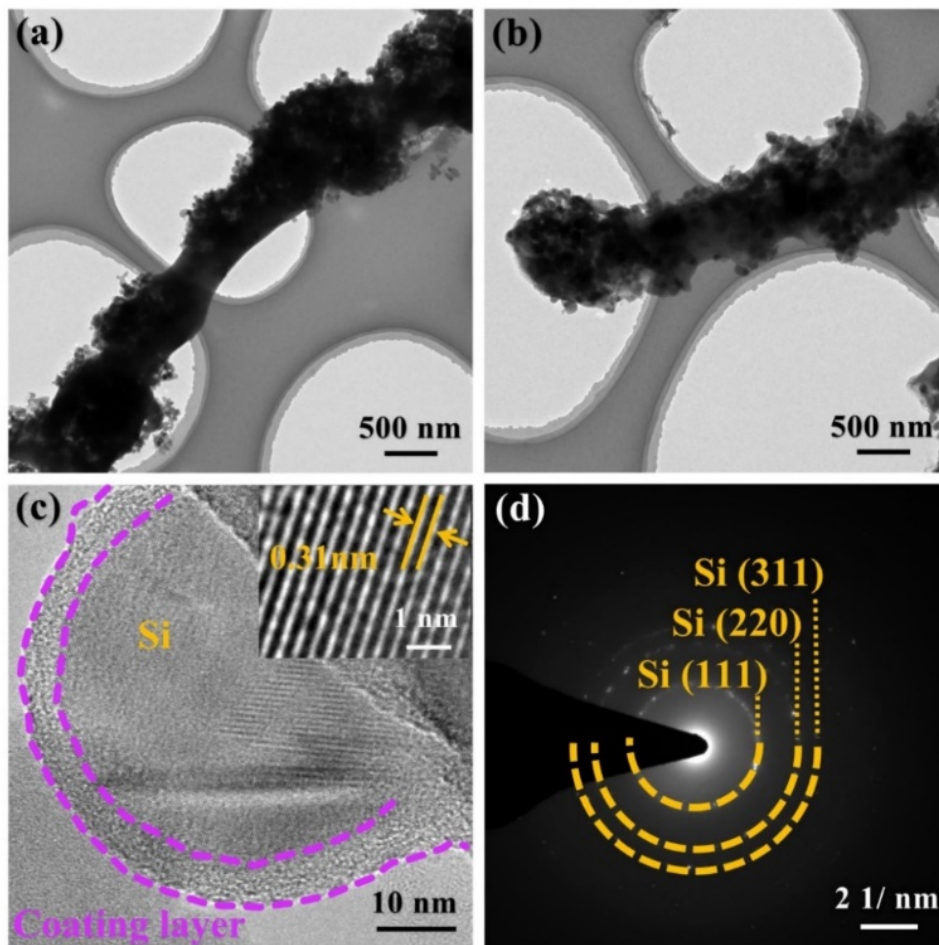

**Figure S3.** (a-b) TEM; (c) HR-TEM; (d) SAED of Si@CNFs.

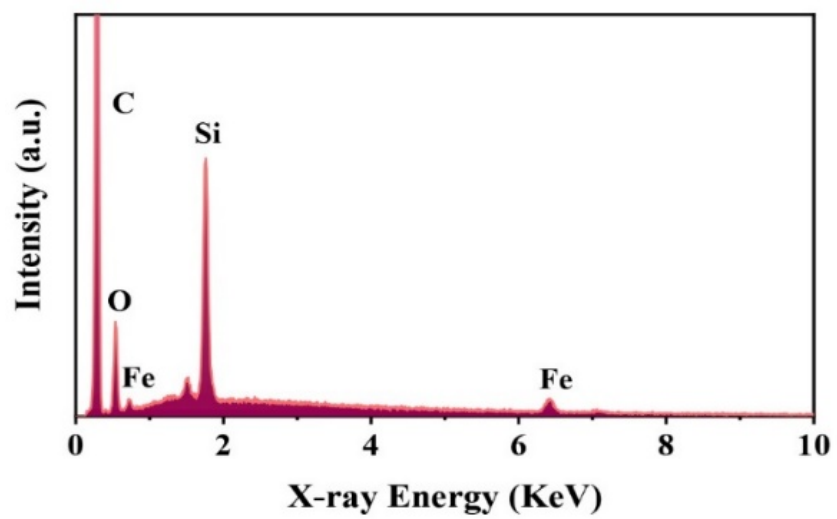

**Figure S4.** EDS spectra for Fe/Fe<sub>3</sub>C-Si@CNFs.

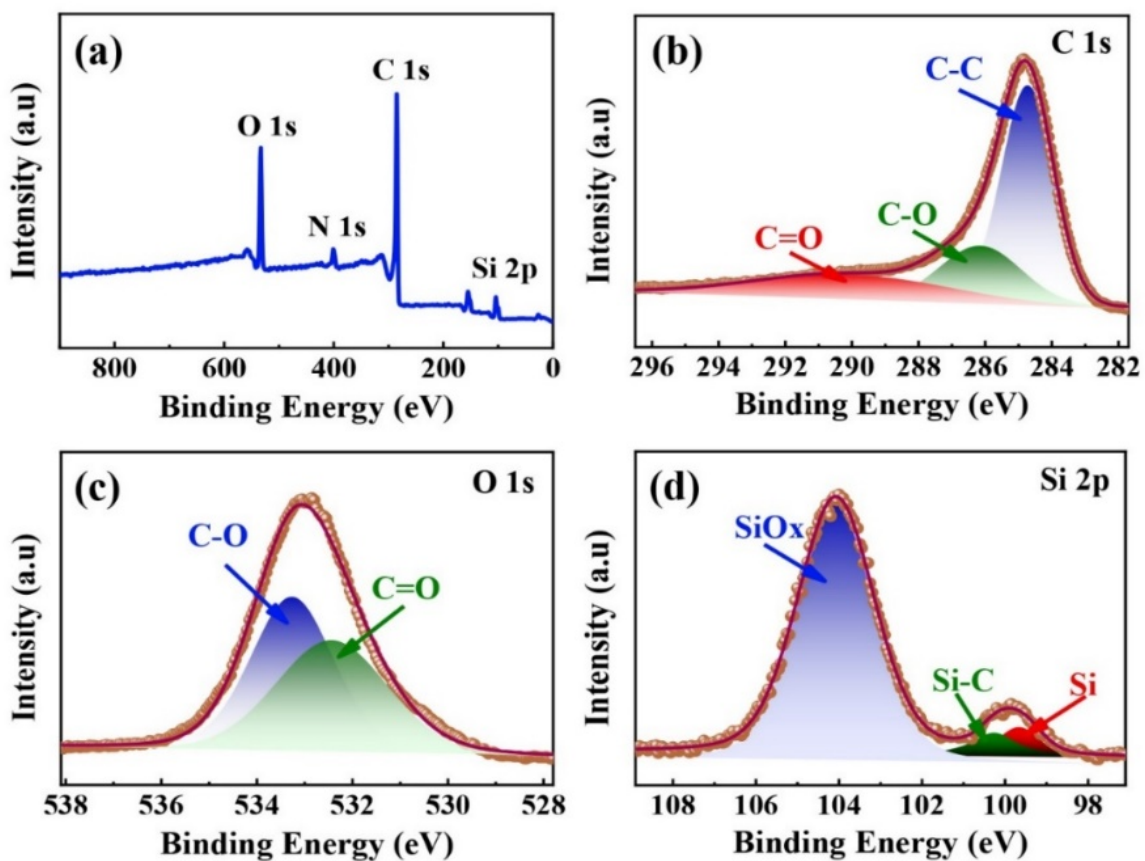

Figure S5. XPS full spectra and high-resolution XPS spectra of C 1s, Si 2p, O 1s for Si@CNFs.



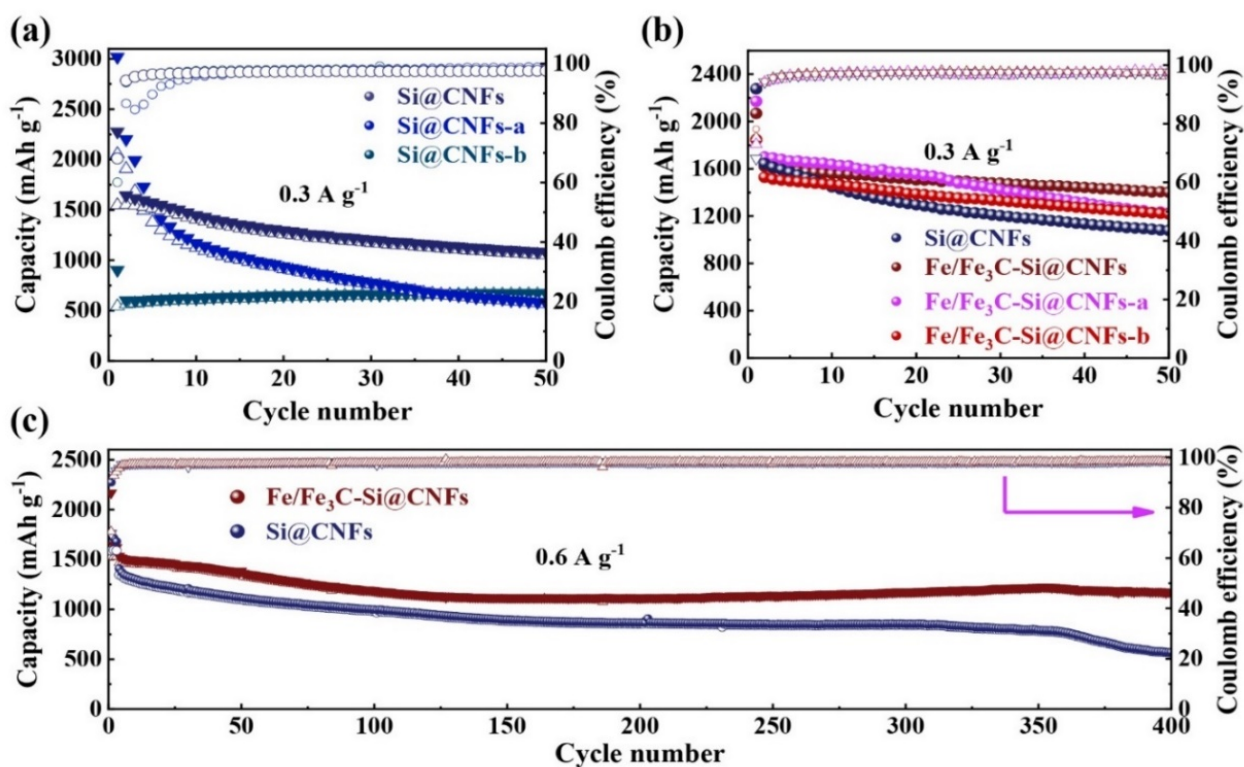

**Figure S6.** The cycle performance of Fe/Fe<sub>3</sub>C-Si@CNFs and Si@CNFs anodes.

**Table S1:** PAN: Si mass ratio corresponds to the corresponding composite material

|                           | Si@CNFs | Si@CNFs-a | Si@CNFs-b |
|---------------------------|---------|-----------|-----------|
| the mass ratio of PAN: Si | 5:2     | 5:1       | 5:3       |

**Table S2:** Si: PAN: FeC<sub>2</sub>O<sub>4</sub>·2H<sub>2</sub>O mass ratio corresponds to the corresponding composite material

|                                                                               | Fe/Fe <sub>3</sub> C-Si@CNFs | Fe/Fe <sub>3</sub> C-Si@CNFs-a | Fe/Fe <sub>3</sub> C-Si@CNFs-b |
|-------------------------------------------------------------------------------|------------------------------|--------------------------------|--------------------------------|
| the mass ratio of PAN: Si: FeC <sub>2</sub> O <sub>4</sub> ·2H <sub>2</sub> O | 20:8:3                       | 20:8:2                         | 20:8:4                         |

In order to determine the optimal material ratio, we carried out many experiments based on different ratios of PAN, Si, and FeC<sub>2</sub>O<sub>4</sub>·2H<sub>2</sub>O as shown in **Table S1** and **S2**. It is known from **Figure S6a** that different mass ratio for PAN: Si displays its own advantage. When the mass ratio of PAN: Si is 5:1, Si@CNFs-a shows low capacity and excellent stability and is 5:3, Si@CNFs-b displays high and dramatically reduced capacity. Interestingly, we choose the mass ratio of PAN: Si at 5:2 as the research proportion because the capacity and stability of Si@CNFs have been improved. Furthermore, the adding Fe/Fe<sub>3</sub>C with improving interface compatibility and reducing side effects can improve cycle



performance proved by **Figure S6b**. As the content of Fe/Fe<sub>3</sub>C increases, the capacity decreases, but when the mass ratio of PAN: Si: FeC<sub>2</sub>O<sub>4</sub>·2H<sub>2</sub>O at 20:8:3, Fe/Fe<sub>3</sub>C-Si@CNFs shows better electrochemical performance.

**Table S3:** Some cycle performances of silicon-carbon based LIBs in recent years

| Samples of silicon-carbon based             | Special capacity (mAh g <sup>-1</sup> ) | Current density (A g <sup>-1</sup> ) | Cycle number | Ref.             |
|---------------------------------------------|-----------------------------------------|--------------------------------------|--------------|------------------|
| onion-like Si/C                             | 1391.3                                  | 0.2                                  | 400          | [1]              |
| Si-Sn@C/Cu <sub>3</sub> Si-P <sub>260</sub> | 932                                     | 1.5                                  | 500          | [2]              |
| Si@zinccone/TiO <sub>2</sub>                | 753                                     | 2.0                                  | 1000         | [3]              |
| GP-Si                                       | 1059                                    | 2.0                                  | 500          | [4]              |
| Si@ZIF-67                                   | 820                                     | 5.0                                  | 1000         | [5]              |
| Si@C@ZIF-67-800N                            | 853                                     | 1.0                                  | 300          | [6]              |
| silicon-carbon-based<br>Si/CNTs             | 1275.5                                  | 1.0                                  | 400          | [7]              |
| CNTs/Si/C nanotubes                         | 932.2                                   | 2.0                                  | 1000         | [8]              |
| Si@10-ZC                                    | 839                                     | 1.0                                  | 200          | [9]              |
| SiNDs@DSHC                                  | 750                                     | 1.0                                  | 2000         | [10]             |
| CNTs@Silicon                                | 1152                                    | 0.6                                  | 500          | [11]             |
| Si@CNT/C microscroll                        | 2710                                    | 0.2                                  | 300          | [12]             |
| SF@G                                        | ~1500                                   | 2.0                                  | 500          | [13]             |
| silicon-carbon-fibers based<br>Si@HC/CNFs   | 1076.5                                  | 0.2                                  | 100          | [14]             |
| Si@void@C NF                                | 1045                                    | 0.5                                  | 100          | [15]             |
| Si@MC-CNFs                                  | 771                                     | 0.1                                  | 150          | [16]             |
| NL-Si@C-0.5                                 | 710                                     | 0.5                                  | 200          | [17]             |
| SHCM/NCF                                    | 1442                                    | 1.0                                  | 800          | [18]             |
| Si@c-ZIF@CNFs                               | 518.6                                   | 1.0                                  | 100          | [19]             |
| Si/C-ZIF/CNFs                               | 538.6                                   | 0.5                                  | 500          | [20]             |
| <b>Fe/Fe<sub>3</sub>C-Si@CNFs</b>           | <b>956.5</b>                            | <b>2.0</b>                           | <b>4000</b>  | <b>This work</b> |

**Reference:**

- [1] D. Wang, C. Zhou, B. Cao, Y. Xu, D. Zhang, A. Li, J. Zhou, Z. Ma, X. Chen, H. Song, One-step synthesis of spherical Si/C composites with onion-like buffer structure as high-performance anodes for lithium-ion batteries, *Energy Storage Mater.* 24 (2020) 312-318.
- [2] Z. Dong, W. Du, H. Gu, Y. Long, C. Zhang, G. Chen, Z. Feng, W. Sun, Y. Jiang, Y. Liu, Y. Yang, J. Gan, M. Gao, H. Pan, A Unique Structural Highly Compacted Binder-Free Silicon-Based Anode with High Electronic Conductivity for High-Performance Lithium-Ion Batteries, *Small Struct.* 3 (2021) 2100174-2100187.

- [3] J. B. Fang, Y. Q. Cao, S. Z. Chang, F. R. Teng, D. Wu, A. D. Li, Dual-Design of Nanoporous to Compact Interface via Atomic/Molecular Layer Deposition Enabling a Long-Life Silicon Anode, *Adv. Funct. Mater.* 32 (2022) 2109682-2109691.
- [4] Z. Yang, C. Wu, S. Li, L. Qiu, Z. Yang, Y. Zhong, B. Zhong, Y. Song, G. Wang, Y. Liu, Z. Wu, X. Guo, A Unique Structure of Highly Stable Interphase and Self-Consistent Stress Distribution Radial-Gradient Porous for Silicon Anode, *Adv. Funct. Mater.* 32 (2021) 2107897-2107904.
- [5] R. Gao, J. Tang, X. Yu, S. Tang, K. Ozawa, T. Sasaki, L.-C. Qin, In situ synthesis of MOF-derived carbon shells for silicon anode with improved lithium-ion storage, *Nano Energy* 70 (2020) 104444-104451.
- [6] N. Liu, J. Liu, D. Jia, Y. Huang, J. Luo, X. Mamat, Y. Yu, Y. Dong, G. Hu, Multi-core yolk-shell like mesoporous double carbon-coated silicon nanoparticles as anode materials for lithium-ion batteries, *Energy Storage Mater.* 18 (2019) 165-173.
- [7] Z. Yi, N. Lin, Y. Zhao, W. Wang, Y. Qian, Y. Zhu, Y. Qian, A flexible micro/nanostructured Si microsphere cross-linked by highly-elastic carbon nanotubes toward enhanced lithium ion battery anodes, *Energy Storage Mater.* 17 (2019) 93-100.
- [8] R. Liu, C. Shen, Y. Dong, J. Qin, Q. Wang, J. Iocozzia, S. Zhao, K. Yuan, C. Han, B. Li, Z. Lin, Sandwich-like CNTs/Si/C nanotubes as high performance anode materials for lithium-ion batteries, *J. Mater. Chem. A* 6 (2018) 14797-14804.
- [9] T. Mu, Y. Zhao, C. Zhao, N. G. Holmes, S. Lou, J. Li, W. Li, M. He, Y. Sun, C. Du, R. Li, J. Wang, G. Yin, X. Sun, Stable Silicon Anodes by Molecular Layer Deposited Artificial Zincone Coatings, *Adv. Funct. Mater.* 31 (2021) 2010526-2010534.
- [10] R. Zhu, X. Hu, K. Chen, J. Dang, X. Wang, X. Liu, H. Wang, Double-shelled hollow carbon nanospheres as enclosed electrochemical reactors to enhance the lithium storage performance of silicon nanodots, *J. Mater. Chem. A* 8 (2020) 12502-12517.
- [11] T. Ma, H. Xu, X. Yu, H. Li, W. Zhang, X. Cheng, W. Zhu, X. Qiu, Lithiation Behavior of Coaxial Hollow Nanocables of Carbon-Silicon Composite, *ACS Nano* 13 (2019) 2274-2280.
- [12] Y. Chen, Y. Hu, Z. Shen, R. Chen, X. He, X. Zhang, Y. Li, K. Wu, Hollow core-shell structured silicon@carbon nanoparticles embed in carbon nanofibers as binder-free anodes for lithium-ion batteries, *J. Power Sources* 342 (2017) 467-475.
- [13] H. Wang, J. Fu, C. Wang, J. Wang, A. Yang, C. Li, Q. Sun, Y. Cui, H. Li, A binder-free high silicon content flexible anode for Li-ion batteries, *Energy Environ. Sci.* 13 (2020) 848-858.
- [14] X. Zhang, D. Wang, X. Qiu, Y. Ma, D. Kong, K. Mullen, X. Li, L. Zhi, Stable high-capacity and high-rate silicon-based lithium battery anodes upon two-dimensional covalent encapsulation, *Nat. Commun.* 11 (2020) 3826-3834.

- [15] Y. Han, J. Zou, Z. Li, W. Wang, Y. Jie, J. Ma, B. Tang, Q. Zhang, X. Cao, S. Xu, Z. L. Wang, Si@void@C Nanofibers Fabricated Using a Self-Powered Electrospinning System for Lithium-Ion Batteries, *ACS Nano* 12 (2018) 4835-4843.
- [16] X. Chen, P. Hu, J. Xiang, R. Zhang, Y. Huang, Confining Silicon Nanoparticles within Freestanding Multichannel Carbon Fibers for High-Performance Li-Ion Batteries, *ACS Appl. Energy Mater.* 2 (2019) 5214-5218.
- [17] X. Kong, Y. Zheng, Y. Wang, S. Liang, G. Cao, A. Pan, Necklace-like Si@C nanofibers as robust anode materials for high performance lithium ion batteries, *Sci. Bull.* 64 (2019) 261-269.
- [18] R. Zhu, Z. Wang, X. Hu, X. Liu, H. Wang, Silicon in Hollow Carbon Nanospheres Assembled Microspheres Cross-linked with N-doped Carbon Fibers toward a Binder Free, High Performance, and Flexible Anode for Lithium-Ion Batteries, *Adv. Funct. Mater.* 31 (2021) 2101487-2101498.
- [19] J. Chen, X. Guo, M. Gao, J. Wang, S. Sun, K. Xue, S. Zhang, Y. Liu, J. Zhang, Self-supporting dual-confined porous Si@c-ZIF@carbon nanofibers for high-performance lithium-ion batteries, *Chem. Commun.* 57 (2021) 10580-10583.
- [20] Y. Zeng, Y. Huang, N. Liu, X. Wang, Y. Zhang, Y. Guo, H.-H. Wu, H. Chen, X. Tang, Q. Zhang, N-doped porous carbon nanofibers sheathed pumpkin-like Si/C composites as free-standing anodes for lithium-ion batteries, *J. Energy Chem.* 54 (2021) 727-735.

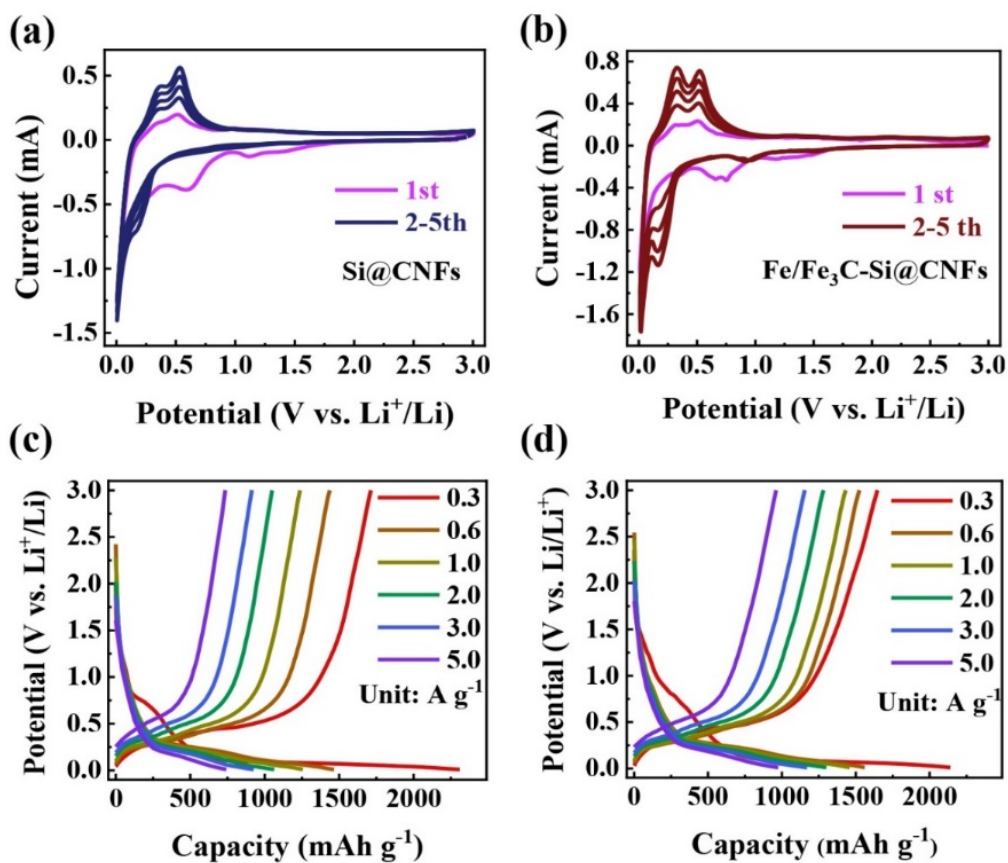

**Figure S7.** (a) CV curve at 0.2 mV s<sup>-1</sup> and (c) rate performance charge-discharge curves of Si@CNFs; (b) CV curve at 0.2 mV s<sup>-1</sup> and (d) rate performance charge-discharge curves of Fe/Fe<sub>3</sub>C-Si@CNFs.

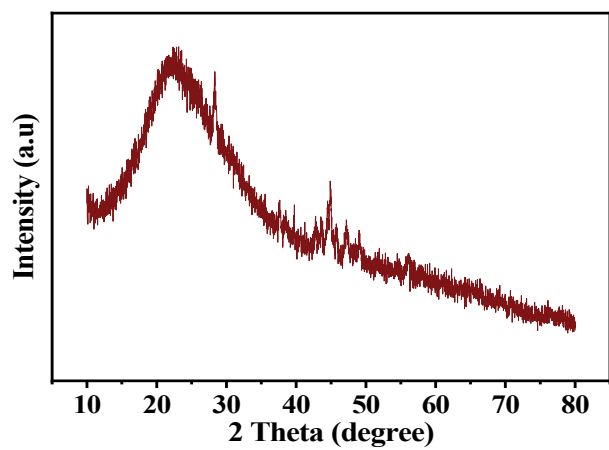

**Figure S8.** Ex-situ XRD of Fe/Fe<sub>3</sub>C-Si@CNFs after 10 cycles.



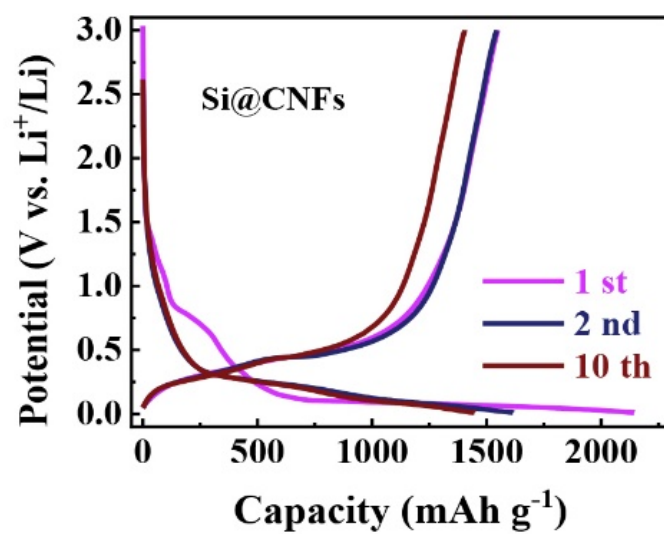

**Figure S9.** Typical discharge-charge profiles tested at 0.3 A g<sup>-1</sup> for Si@CNFs.

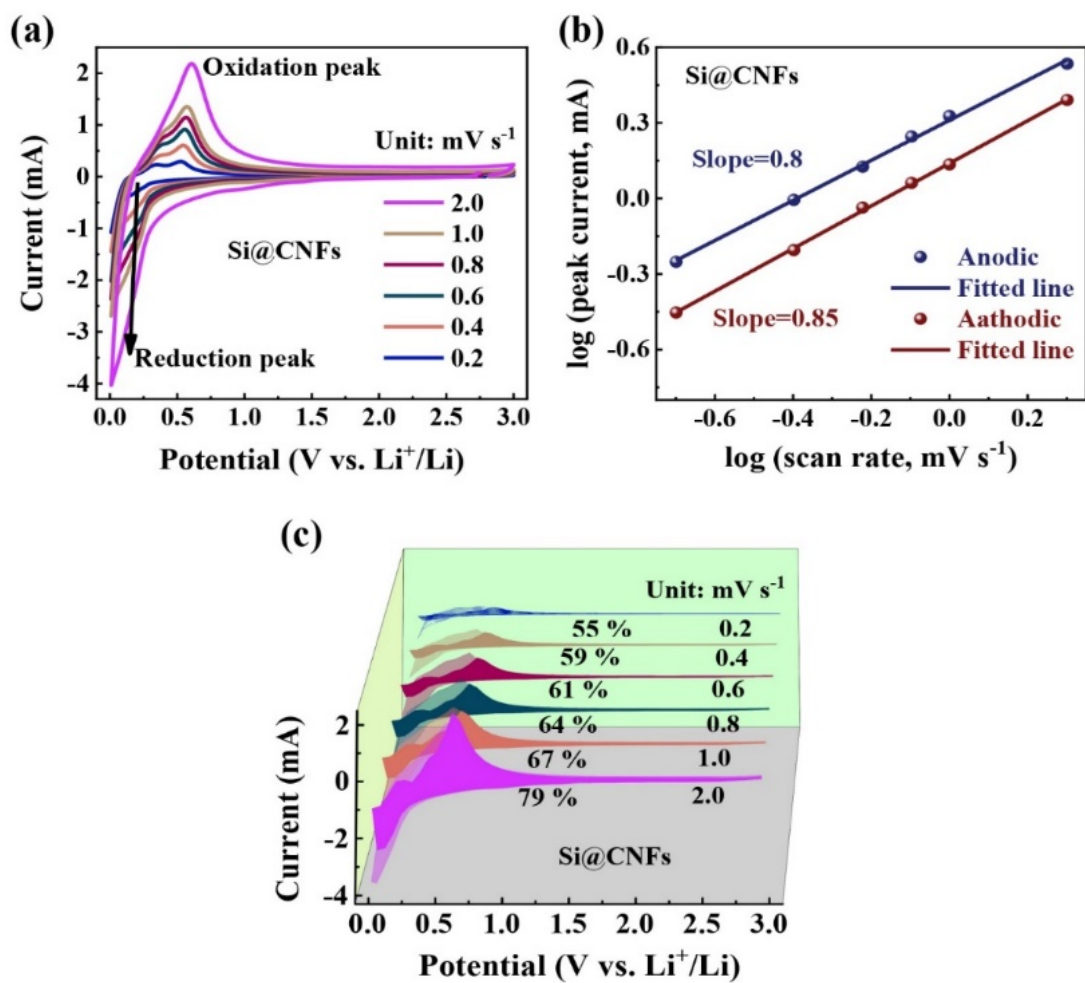

**Figure S10.** (a) CV curves at different scan rates, (b) Relationship between  $\log(i)$  and  $\log(v)$ , and (c) Ratios of capacitance of Si@CNFs.

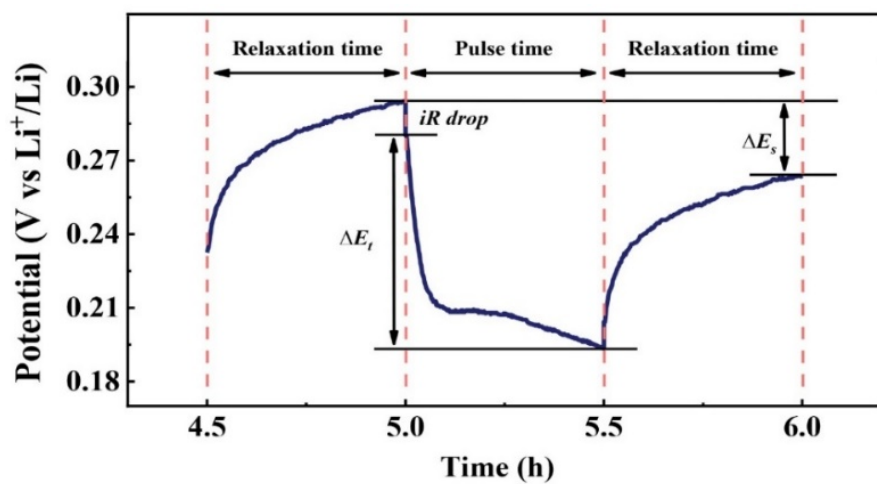

**Figure S11.** Single GITT electrode during discharge. The *iR* drop is shown along with the  $\Delta E_s$  and  $\Delta E_t$ .

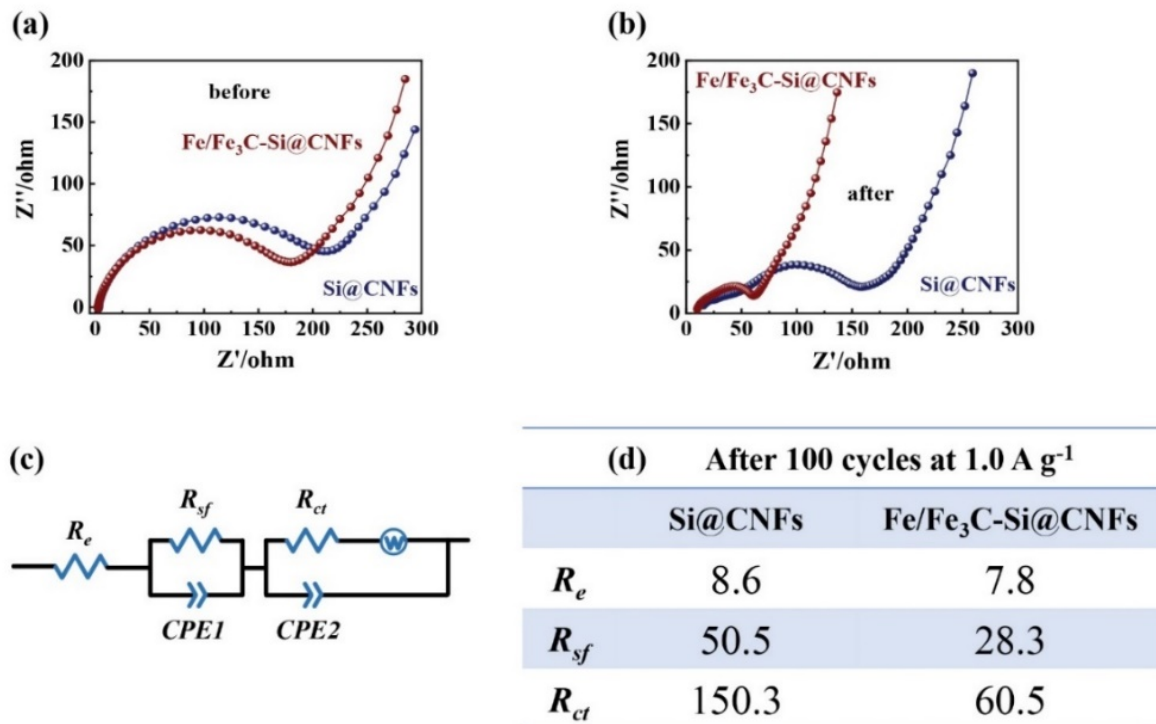

**Figure S12.** The comparative electrochemical impedance spectra for Si@CNFs and Fe/Fe<sub>3</sub>C-Si@CNFs: (a) before test; (b) after 100 cycles; (c) the corresponding equivalent circuit and (d) impedance parameters for **Figure S12b**.

As we know, electrochemical impedance spectroscopy (EIS) is a highly resolved electro-analytical technique that may provide unique information about the nature of electrode process related to a wide range of time constants. The EIS measurement of fresh and post cycling batteries for Si@CNFs and Fe/Fe<sub>3</sub>C-Si@CNFs are displayed in **Figure S12**, revealing equivalent electrical circuit model and impedance parameters. The EIS results in **Figure S12a** show that two electrodes delivered the similar electrochemical impedance, but the Fe/Fe<sub>3</sub>C adding slightly reduce the conductance of its composite. It is known from **Figure S12b** that the overall shape of Nyquist plots for all samples are composed of three parts including two semicircles followed by a one line. According to the literature,<sup>[1-2]</sup> the high-frequency semicircle is related to Li ion migration through the SEI film covering the surface of the electrode, the middle-frequency semicircle is attributed to charge transfer through the electrode/electrolyte interface, and the steep sloping line is assigned to solid-state diffusion of the Li ions into the bulk of the electrode material. The impedance spectra are fitted with an equivalent circuit as shown in **Figure S12c**, where  $R_e$  is the solution resistance,  $R_{sf}$  and  $CPE1$  are the resistance and capacitance of the SEI film, respectively,  $R_{ct}$  and  $CPE2$  are the charge transfer resistance at the

particle/electrolyte interface and double-layer capacitance, respectively, and  $R_w$  is Warburg impedance. The  $R_{ct}$  value of Fe/Fe<sub>3</sub>C-Si@CNFs is evaluated as 60.5  $\Omega$  much smaller than that (150.3  $\Omega$ ) of Si@CNFs, and the  $R_{sf}$  value of Fe/Fe<sub>3</sub>C-Si@CNFs is calculated as 28.3  $\Omega$  much smaller than that (50.5  $\Omega$ ) of Si@CNFs. Smaller  $R_{ct}$  and  $R_{sf}$  indicate Fe/Fe<sub>3</sub>C adding could improve the electrolyte interface compatibility and suppress the accumulation of the SEI film especially at long cycle.

### Reference:

- [1] S. Zhang, M. S. Ding, K. Xu, J. Allen, T. R. Jow, Understanding Solid Electrolyte Interface Film Formation on Graphite Electrodes, *Electrochem. Solid-State Lett.* 4 (2001) A206-A208.
- [2] S.-D. Xu, Q.-C. Zhuang, L.-L. Tian, Y.-P. Qin, L. Fang, S.-G. Sun, Impedance Spectra of Nonhomogeneous, Multilayered Porous Composite Graphite Electrodes for Li-Ion Batteries: Experimental and Theoretical Studies, *J. Phys. Chem. C* 115 (2011) 9210-9219.

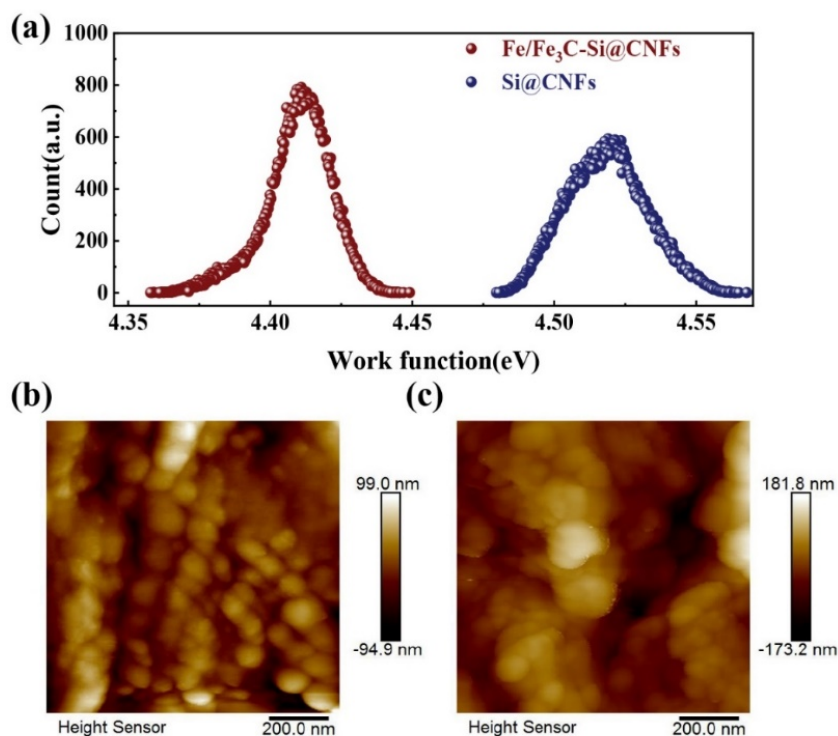

**Figure S13.** (a) the calculated work functions of Fe/Fe<sub>3</sub>C-Si@CNFs and Si@CNFs; surface potential mapping of (b) Fe/Fe<sub>3</sub>C-Si@CNFs and (c) Si@CNFs.

The Kelvin probe atomic force microscopy (KPFM) has been used to investigate the conductivity of electrode materials. **Figures S13b-c** present the surface potential maps of these both composites at room temperature, characterized by KPFM. The work functions for the composites of Fe/Fe<sub>3</sub>C-Si@CNFs and Si@CNFs are presented in **Figures S13a**, where work function represents the minimum thermodynamic energy needed to escape an electron from the materials.<sup>[1-2]</sup> Obviously, Fe/Fe<sub>3</sub>C-Si@CNFs has a smaller work function (~4.41 eV) than that (~4.52 eV) of the Si@CNFs. The smaller work function reflects the improved electron transfer in composite surface, which might be verified that the addition of Fe/Fe<sub>3</sub>C has a certain optimization effect on the interface.

### Reference:

- [1] J. Li, Y. Huang, W. Huang, J. Tao, F. Lv, R. Ye, Y. Lin, Y. y. Li, Z. Huang, J. Lu, Simple Designed Micro-Nano Si-Graphite Hybrids for Lithium Storage, *Small* 17 (2021) 2006373-2006385.
- [2] J. Tao, L. Lu, B. Wu, X. Fan, Y. Yang, J. Li, Y. Lin, Y. Y. Li, Z. Huang, J. Lu, Dramatic improvement enabled by incorporating thermal conductive TiN into Si-based anodes for lithium ion batteries, *Energy Storage Mater.* 29 (2020) 367-376.



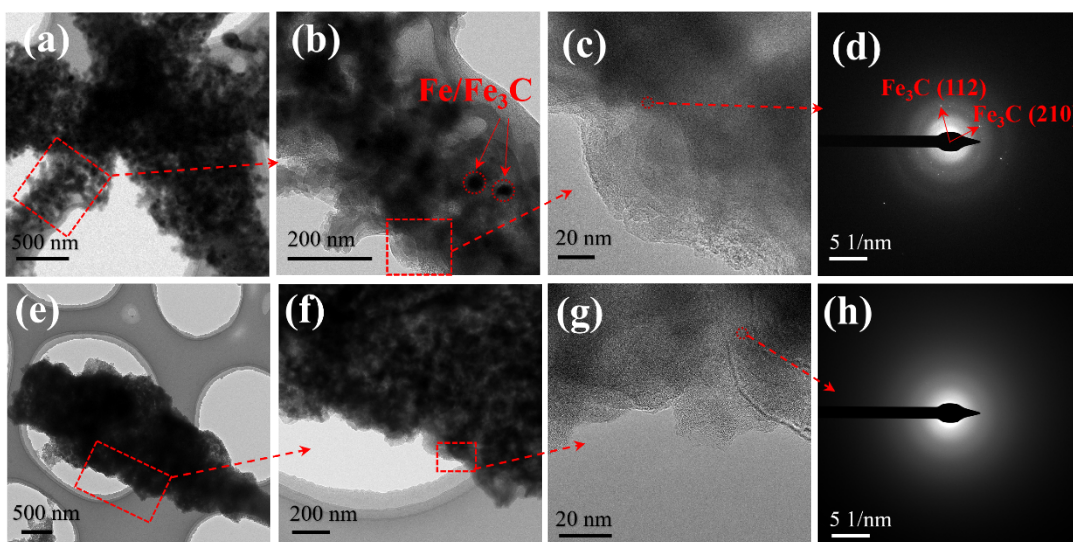

Figure S14. The HR-TEM and SAED of Fe/Fe<sub>3</sub>C-Si@CNFs (a-d) and Si@CNFs (e-h).

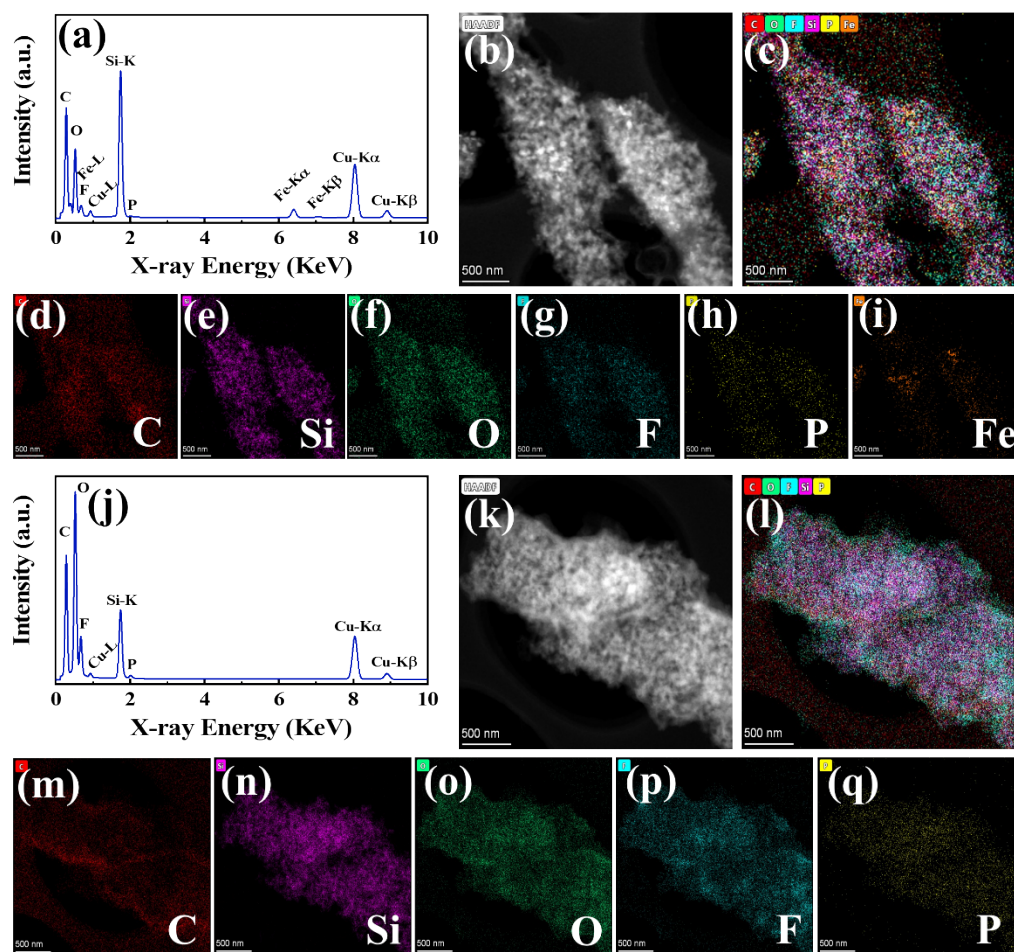

Figure S15. The EDS and element mapping images of Fe/Fe<sub>3</sub>C-Si@CNFs (a-i) and Si@CNFs (j-q).

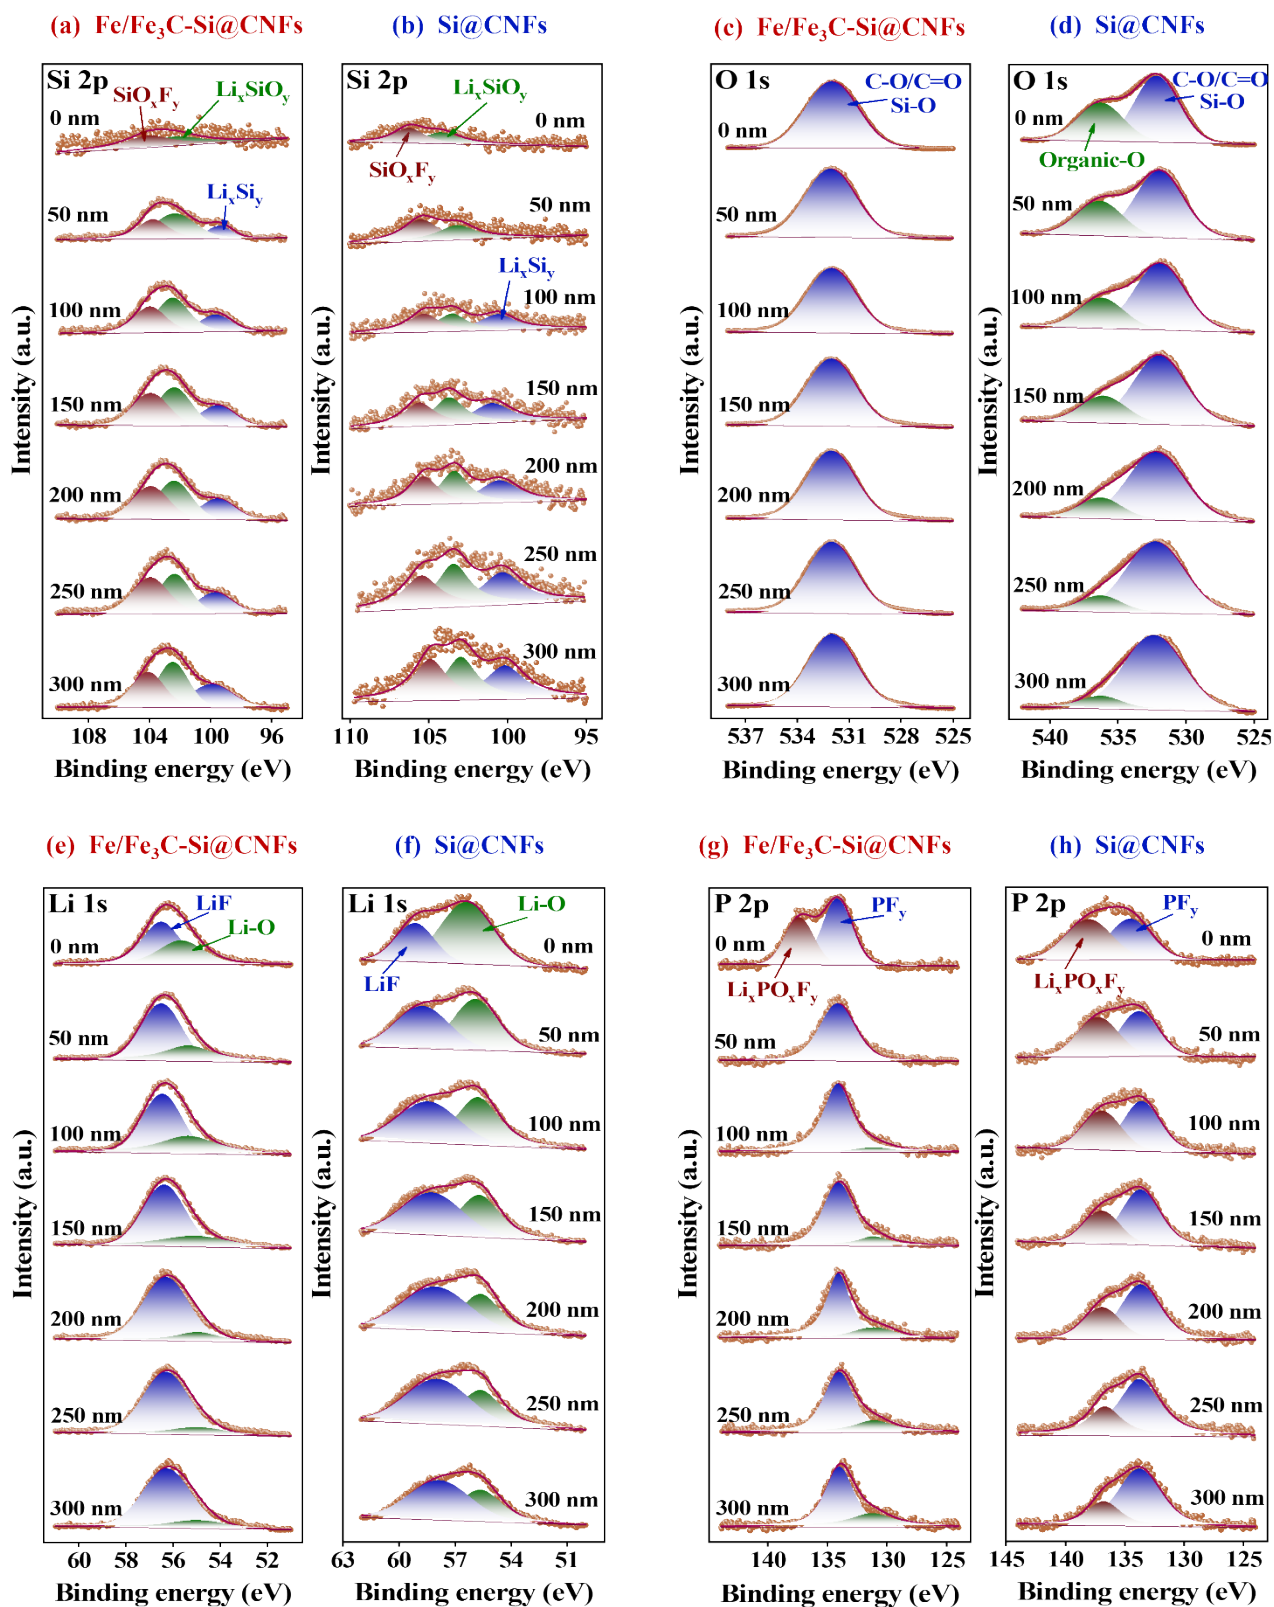

**Figure S16.** (a-h) High-resolution XPS etching curves for Fe/Fe<sub>3</sub>C-Si@CNFs and Si@CNFs anodes.

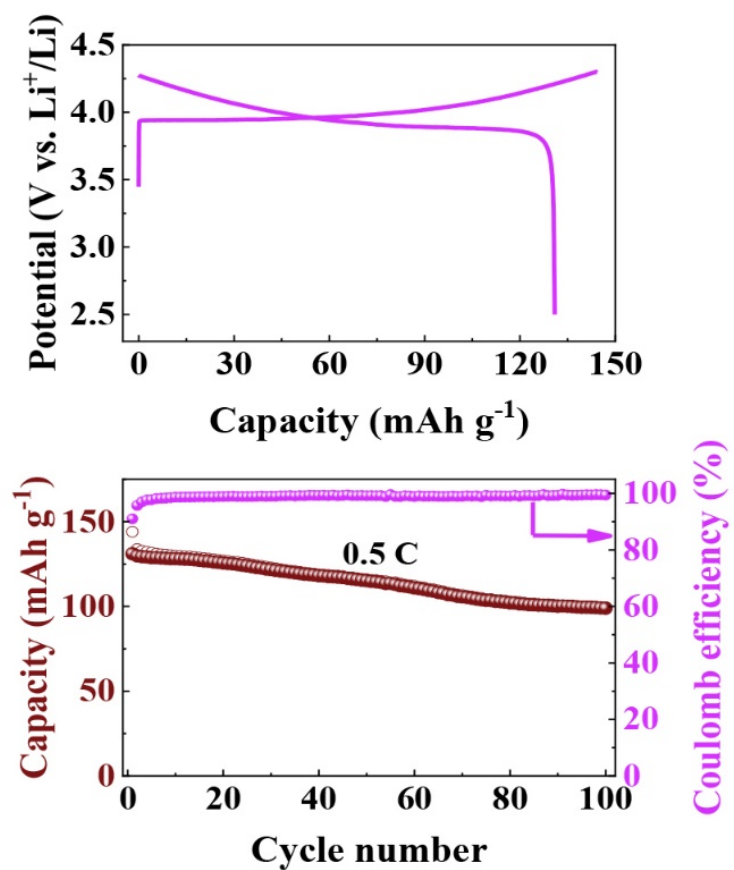

**Figure S17.** The electrochemical performance of coin-type LCoO<sub>2</sub> half-cell at 0.5C.
